# Supplementary material for: Factor VIII cross-matches to the human proteome reduce the predicted inhibitor risk in missense mutation hemophilia A
Source: PubMed Central journal article supplement — Haematologica. 2018 Sep 28;104(3):599–608. doi: 10.3324/haematol.2018.195669 (PMC6395325; doi:10.3324/haematol.2018.195669), 2019-03
Supplement: 2018_195669-Disclosures_and_Contributions.pdf [file 2018_195669-Disclosures_and_Contributions.pdf]

Haematologica  
HAEMATOL/2018/195669  
Version 3

Factor VIII cross-matches to the human proteome reduce the predicted inhibitor risk in missense mutation hemophilia A

Daniel P. Hart, Nazmiye Uzun, Stuart Skelton, Alison Kakoschke,  
Jacob Househam, David S. Moss, and Adrian J. Shepherd

Disclosures: Dan P. Hart received funding from the British Society of Haematology. DP Hart received research grant funding from Shire and Octapharma for work outside the submitted work within the last 36 months. He or his institution received honoraria for speaking or consultancy engagements from Pfizer, Shire, Bayer, Octapharma, Biomarin, Biotest, Novonordisk & Roche. AJ Shepherd received research grant funding from Octapharma (via a sub-contract with Queen Mary University of London) for work outside the submitted work within the last 36 months. No copyrights or patents pending.

Contributions: NU, SS, AK and JH wrote code and performed in silico experiments. NU, SS, DSM, DPH and AJS analyzed results. NU and AJS made the figures. DPH and AJS designed the research and wrote the paper.
